# Supplementary material
Source: PubMed Central journal article supplement (PMC4997877)
Supplement: AAC.02838-15_zac008165442so1.pdf [file AAC.02838-15_zac008165442so1.pdf]

**The spiroindolone KAE609 does not induce the development of dormant ring-stages of *Plasmodium falciparum* parasites, *in vitro***

**Running Title:** KAE609 prevents the growth of artemisinin-arrested ring-stages of *Plasmodium falciparum*

**Authors:** Marina Chavchich<sup>1#</sup>, Karin Van Breda<sup>1</sup>, Kerryn Rowcliffe<sup>1</sup>, Thierry T. Diagana<sup>2</sup> and Michael D. Edstein<sup>1</sup>

Keywords: dormancy, resistance, KAE609, dihydroartemisinin, artemether, lumefantrine, falciparum malaria.

<sup>1</sup>) Australian Army Malaria Institute, Enoggera, Brisbane, QLD, 4051, Australia;

<sup>2</sup>) Novartis Institute of Tropical Diseases, Singapore.

### **Supplemental Material**

**Table S1.** Microscopic observations on parasites recovery after exposure of ring-stage parasites of W2 *Plasmodium falciparum* parasites to KAE609, dihydroartemisinin (DHA), artemether (ART), lumefantrine (LUM) and their combinations.

| Sample name<br>[Compound xIC <sub>90</sub> ] | Recrudescence<br>(Yes/No) | Growing parasites<br>observed<br>(days) | No. of days<br>until<br>~0.5%<br>Parasite<br>mia | No. of<br>experimen<br>ts | Dormant<br>rings<br>observed<br>(Yes/No) | Comments                                                                                            |
|----------------------------------------------|---------------------------|-----------------------------------------|--------------------------------------------------|---------------------------|------------------------------------------|-----------------------------------------------------------------------------------------------------|
| KAE609 1.25x                                 | -                         |                                         |                                                  | 2                         | No                                       | Parasites did not stop growing as in W2CTL.                                                         |
| KAE609 2.5x                                  | -                         |                                         |                                                  | 2                         | No                                       | Parasites did not stop growing as in W2CTL.                                                         |
| KAE609 5x                                    | -                         |                                         |                                                  | 2                         | No                                       | Parasites did not stop growing as in W2CTL.                                                         |
| KAE609 12.5x                                 | Yes                       | 14                                      | 16                                               | 3                         | No                                       | Majority of parasites were killed.                                                                  |
| KAE609 25x                                   | Yes                       | 18                                      | 23                                               | 4                         | No                                       | Majority of parasites were killed.                                                                  |
| KAE609 50x                                   | No                        |                                         |                                                  | 4                         | No                                       | All parasites were killed. Parasite growth was inhibited for the 8 week duration of the experiment. |
| KAE609 100x                                  | No                        |                                         |                                                  | 2                         | No                                       | All parasites were killed. Parasite growth was inhibited for the 8 week duration of the experiment. |
| KAE609 200x                                  | No                        |                                         |                                                  | 1                         | No                                       | All parasites were killed. Parasite growth was inhibited for the 8 week duration of the experiment. |
| DHA                                          | Yes                       | 3                                       | 5                                                | 4                         | Yes                                      | Growth arrested and resumed.                                                                        |
| DHA+KAE609 1.25x                             | Yes                       | 3                                       | 5                                                | 1                         | Yes                                      | Growth arrested and resumed.                                                                        |
| DHA+KAE609 2.5x                              | Yes                       | 5                                       | 7                                                | 1                         | Yes                                      | Growth arrested and resumed.                                                                        |

|                  |     |    |    |   |     |                                                                                                     |
|------------------|-----|----|----|---|-----|-----------------------------------------------------------------------------------------------------|
| DHA+KAE609 5x    | Yes | 5  | 7  | 1 | Yes | Growth arrested and resumed.                                                                        |
| DHA+KAE609 12.5x | Yes | 16 | 18 | 2 | Yes | Growth arrested and resumed.                                                                        |
| DHA+KAE609 25x   | No  |    |    | 2 | Yes | All parasites were killed. Parasite growth was inhibited for the 8 week duration of the experiment. |
| DHA+KAE609 50x   | No  |    |    | 2 | Yes | All parasites were killed. Parasite growth was inhibited for the 8 week duration of the experiment. |
| DHA+LUM 10x      | Yes | 6  | 10 | 1 | Yes | Growth arrested and resumed.                                                                        |
| DHA+LUM 25x      | Yes | 16 | 18 | 2 | Yes | Growth arrested and resumed.                                                                        |
| DHA+LUM 50x      | No  |    |    | 2 | Yes | All parasites were killed. Parasite growth was inhibited for the 8 week duration of the experiment. |
| DHA+LUM 100x     | No  |    |    | 2 | Yes | All parasites were killed. Parasite growth was inhibited for the 8 week duration of the experiment. |
| LUM 10x          | -   |    |    | 3 | No  | Parasites did not stop growing as in W2CTL.                                                         |
| LUM 25x          | Yes | 10 |    | 2 | No  | Majority of parasites were killed.                                                                  |
| LUM 50x          | No  |    |    | 2 | No  | All parasites were killed. Parasite growth was inhibited for the 8 week duration of the experiment. |
| LUM 100x         | No  |    |    | 3 | No  | All parasites were killed. Parasite growth was inhibited for the 8 week duration of the experiment. |
| ART 100x         | Yes | 3  | 4  | 3 | Yes | Growth arrested and resumed.                                                                        |

|              |     |    |    |   |     |                                                                                                     |
|--------------|-----|----|----|---|-----|-----------------------------------------------------------------------------------------------------|
| ART+LUM 10x  | Yes | 4  | 9  | 1 | Yes | Growth arrested and resumed.                                                                        |
| ART+LUM 25x  | Yes | 12 | 14 | 2 | Yes | Growth arrested and resumed.                                                                        |
| ART+LUM 50x  | No  |    |    | 2 | Yes | All parasites were killed. Parasite growth was inhibited for the 8 week duration of the experiment. |
| ART+LUM 100x | No  |    |    | 2 | Yes | All parasites were killed. Parasite growth was inhibited for the 8 week duration of the experiment. |
